# Supplementary material for: Macrophage Gene Expression Associated with Remodeling of the Prepartum Rat Cervix: Microarray and Pathway Analyses
Source: PubMed Central journal article supplement (PMC4374766; doi:10.1371/journal.pone.0119782), 2015-03-26
Supplement: pone.0119782.s003.pdf [file pone.0119782.s003.pdf]

Supplement Table 1. Increased expression of Mφ genes in cervix from both prepartum (D21) and nonpregnant (NP) rats (p<0.01; average whole/Mφ-depleted cervix/group)

| Symbol     | Entrez Gene Name                                                                       | Fold Change |     | Ratio D21/NP |
|------------|----------------------------------------------------------------------------------------|-------------|-----|--------------|
|            |                                                                                        | D21         | NP  |              |
| CSF1R      | colony stimulating factor 1 receptor                                                   | 107         | 100 | 1.073        |
| EMR1       | egf-like module containing, mucin-like, hormone receptor-like 1                        | 104         | 100 | 1.044        |
| Fcrls      | Fc receptor-like S, scavenger receptor                                                 | 87          | 100 | 0.870        |
| CD4        | CD4 molecule                                                                           | 85          | 50  | 1.695        |
| PLD4       | phospholipase D family, member 4                                                       | 72          | 100 | 0.719        |
| CXCL13     | chemokine (C-X-C motif) ligand 13                                                      | 65          | 100 | 0.654        |
| Lyz1/Lyz2  | lysozyme 2                                                                             | 62          | 100 | 0.617        |
| MMP12      | matrix metalloproteinase 12 (macrophage elastase)                                      | 58          | 20  | 2.890        |
| Fcna       | ficolin A                                                                              | 56          | 17  | 3.390        |
| CYBB       | cytochrome b-245, beta polypeptide                                                     | 52          | 100 | 0.521        |
| CCR1       | chemokine (C-C motif) receptor 1                                                       | 50          | 33  | 1.493        |
| LY86       | lymphocyte antigen 86                                                                  | 49          | 100 | 0.488        |
| RGD1562525 | similar to cell surface receptor FDFACT                                                | 49          | 100 | 0.488        |
| FCGR3A     | Fc fragment of IgG, low affinity IIIa, receptor (CD16a)                                | 40          | 33  | 1.195        |
| FCGR1A     | Fc fragment of IgG, high affinity Ia, receptor (CD64)                                  | 38          | 100 | 0.385        |
| CD53       | CD53 molecule                                                                          | 37          | 50  | 0.749        |
| HLA-DQB1   | major histocompatibility complex, class II, DQ beta 1                                  | 36          | 20  | 1.786        |
| MS4A6A     | membrane-spanning 4-domains, subfamily A, member 6A                                    | 35          | 50  | 0.702        |
| MS4A7      | membrane-spanning 4-domains, subfamily A, member 7                                     | 35          | 50  | 0.699        |
| FCER1G     | Fc fragment of IgE, high affinity I, receptor for; gamma polypeptide                   | 33          | 50  | 0.664        |
| C5AR1      | complement component 5a receptor 1                                                     | 33          | 100 | 0.331        |
| KCNMB1     | K <sup>+</sup> large conductance Ca <sup>++</sup> -channel, subfamily M, beta member 1 | 32          | 50  | 0.649        |
| POSTN      | periostin, osteoblast specific factor                                                  | 31          | 100 | 0.314        |
| Ms4a6b     | membrane-spanning 4-domains, subfamily A, member 6B                                    | 31          | 50  | 0.617        |
| Ms4a6c     | membrane-spanning 4-domains, subfamily A, member 6C                                    | 28          | 50  | 0.567        |
| LYVE1      | lymphatic vessel endothelial hyaluronan receptor 1                                     | 28          | 14  | 1.928        |
| HSPB7      | heat shock 27kDa protein family, member 7 (cardiovascular)                             | 27          | 100 | 0.268        |
| HLA-DRA    | major histocompatibility complex, class II, DR alpha                                   | 26          | 25  | 1.042        |
| CLEC4A     | C-type lectin domain family 4, member A                                                | 26          | 25  | 1.036        |
| HLA-DMB    | major histocompatibility complex, class II, DM beta                                    | 24          | 20  | 1.179        |
| ALOX5AP    | arachidonate 5-lipoxygenase-activating protein                                         | 22          | 50  | 0.442        |
| IGSF6      | immunoglobulin superfamily, member 6                                                   | 22          | 20  | 1.092        |
| MYLK       | myosin light chain kinase                                                              | 20          | 50  | 0.402        |
| GPR183     | G protein-coupled receptor 183                                                         | 20          | 25  | 0.802        |
