# Supplementary material for: Macrophage Gene Expression Associated with Remodeling of the Prepartum Rat Cervix: Microarray and Pathway Analyses
Source: PubMed Central journal article supplement (PMC4374766; doi:10.1371/journal.pone.0119782), 2015-03-26
Supplement: pone.0119782.s004.pdf [file pone.0119782.s004.pdf]

Supplement Table 2. Increased expression of M $\phi$  genes in the nonpregnant (NP) rat cervix (p<0.01; average whole/M $\phi$ -depleted cervix/group)

| Symbol    | Entrez Gene Name                                           | Fold Change |
|-----------|------------------------------------------------------------|-------------|
| C1QA      | complement component 1, q subcomponent, A chain            | 100         |
| C1QC      | complement component 1, q subcomponent, C chain            | 100         |
| CA3       | carbonic anhydrase III, muscle specific                    | 100         |
| COL12A1   | collagen, type XII, alpha 1                                | 100         |
| COLEC12   | collectin sub-family member 12                             | 100         |
| COX6A2    | cytochrome c oxidase subunit VIa polypeptide 2             | 100         |
| IL13RA2   | interleukin 13 receptor, alpha 2                           | 100         |
| TEKT3     | tektin 3                                                   | 100         |
| TNNC2     | troponin C type 2 (fast)                                   | 100         |
| A2M       | alpha-2-macroglobulin                                      | 50          |
| ACTG2     | actin, gamma 2, smooth muscle, enteric                     | 50          |
| AP1S2     | adaptor-related protein complex 1, sigma 2 subunit         | 50          |
| CFD       | complement factor D (adipsin)                              | 50          |
| DES       | desmin                                                     | 50          |
| FIBIN     | fin bud initiation factor homolog (zebrafish)              | 50          |
| FRZB      | frizzled-related protein                                   | 50          |
| HOXA11    | homeobox A11                                               | 50          |
| OMD       | osteomodulin                                               | 50          |
| QPCT      | glutaminyl-peptide cyclotransferase                        | 50          |
| SLAMF9    | SLAM family member 9                                       | 50          |
| SMOC2     | SPARC related modular calcium binding 2                    | 50          |
| TMEM100   | transmembrane protein 100                                  | 50          |
| TWIST2    | twist homolog 2 (Drosophila)                               | 50          |
| TYROBP    | TYRO protein tyrosine kinase binding protein               | 50          |
| VCAN      | versican                                                   | 50          |
| ADH1C     | alcohol dehydrogenase 1C (class I), gamma polypeptide      | 33          |
| AIF1      | allograft inflammatory factor 1                            | 33          |
| Akr1c14   | aldo-keto reductase family 1, member C14                   | 33          |
| C1QB      | complement component 1, q subcomponent, B chain            | 33          |
| CIDEC     | cell death-inducing DFFA-like effector c                   | 33          |
| CLEC10A   | C-type lectin domain family 10, member A                   | 33          |
| CLEC11A   | C-type lectin domain family 11, member A                   | 33          |
| CTSK      | cathepsin K                                                | 33          |
| DDIT4L    | DNA-damage-inducible transcript 4-like                     | 33          |
| GDF10     | growth differentiation factor 10                           | 33          |
| HCK       | hemopoietic cell kinase                                    | 33          |
| HOXA13    | homeobox A13                                               | 33          |
| HSD11B1   | hydroxysteroid (11-beta) dehydrogenase 1                   | 33          |
| INMT      | indolethylamine N-methyltransferase                        | 33          |
| KCNIP4    | Kv channel interacting protein 4                           | 33          |
| LOX       | lysyl oxidase                                              | 33          |
| MARGPRF   | MAS-related GPR, member F                                  | 33          |
| OSR2      | odd-skipped related 2 (Drosophila)                         | 33          |
| PF4       | platelet factor 4                                          | 33          |
| PTGIS     | prostaglandin I2 (prostacyclin) synthase                   | 33          |
| RAMP1     | receptor (G protein-coupled) activity modifying protein 1  | 33          |
| RASD2     | RASD family, member 2                                      | 33          |
| RBP4      | retinol binding protein 4, plasma                          | 33          |
| RPRM      | reprimin, TP53 dependent G2 arrest mediator candidate      | 33          |
| RXFP1     | relaxin/insulin-like family peptide receptor 1             | 33          |
| TNFAIP8L2 | tumor necrosis factor, alpha-induced protein 8-like 2      | 33          |
| TNFRSF11B | tumor necrosis factor receptor superfamily, member 11b     | 33          |
| TREM2     | triggering receptor expressed on myeloid cells 2           | 33          |
| UCMA      | upper zone of growth plate and cartilage matrix associated | 33          |
| ZP2       | zona pellucida glycoprotein 2 (sperm receptor)             | 33          |
