# Supplementary material for: Macrophage Gene Expression Associated with Remodeling of the Prepartum Rat Cervix: Microarray and Pathway Analyses
Source: PubMed Central journal article supplement (PMC4374766; doi:10.1371/journal.pone.0119782), 2015-03-26
Supplement: pone.0119782.s005.pdf [file pone.0119782.s005.pdf]

Supplement Table 3. Decreased expression of Mφ genes in the nonpregnant (NP) rat cervix (p<0.01 ; average whole/Mφ-depleted cervix/group)

| Symbol   | Entrez Gene Name                                                                         | Fold Change |
|----------|------------------------------------------------------------------------------------------|-------------|
| THSD4    | thrombospondin, type I, domain containing 4                                              | -37         |
| FOS      | FBJ murine osteosarcoma viral oncogene homolog                                           | -21         |
| HR       | hairless homolog (mouse)                                                                 | -11         |
| TP73     | tumor protein p73                                                                        | -10         |
| SELE     | selectin E                                                                               | -8          |
| CDCA7L   | cell division cycle associated 7-like                                                    | -7          |
| PAX2     | paired box 2                                                                             | -7          |
| PLEK2    | pleckstrin 2                                                                             | -7          |
| ARHGAP32 | Rho GTPase activating protein 32                                                         | -7          |
| Gm884    | predicted gene 884                                                                       | -6          |
| GADD45B  | growth arrest and DNA-damage-inducible, beta                                             | -6          |
| TIAM1    | T-cell lymphoma invasion and metastasis 1                                                | -6          |
| PTPRF    | protein tyrosine phosphatase, receptor type, F                                           | -6          |
| SEMA3F   | sema domain,immunoglobulin domain(Ig),short basic domain,secreted,(semaphorin) 3F        | -5          |
| IFFO2    | intermediate filament family orphan 2                                                    | -5          |
| DLL1     | delta-like 1 (Drosophila)                                                                | -5          |
| Terc     | telomerase RNA component                                                                 | -5          |
| SYTL1    | synaptotagmin-like 1                                                                     | -5          |
| MARK2    | MAP/microtubule affinity-regulating kinase 2                                             | -5          |
| CAMSAP3  | calmodulin regulated spectrin-associated protein family, member 3                        | -5          |
| SELP     | selectin P (granule membrane protein 140kDa, antigen CD62)                               | -5          |
| B4GALNT1 | beta-1,4-N-acetyl-galactosaminyl transferase 1                                           | -5          |
| CKMT1A/B | creatine kinase, mitochondrial 1B                                                        | -5          |
| JAG1     | jagged 1                                                                                 | -5          |
| EPHB3    | EPH receptor B3                                                                          | -5          |
| GNAT1    | guanine nucleotide binding protein (G protein), alpha transducing activity polypeptide 1 | -5          |
| ULK1     | unc-51-like kinase 1 (C. elegans)                                                        | -5          |
| ZNF692   | zinc finger protein 692                                                                  | -5          |
| RGS12    | regulator of G-protein signaling 12                                                      | -5          |
| KCNJ14   | potassium inwardly-rectifying channel, subfamily J, member 14                            | -5          |
